# Supplementary material
Source: publisher figshare collection journal article supplement (https://acs.figshare.com/ndownloader/files/22046820)
Supplement: Supplementary file 1 [file 22046820]

# Supporting Information

## Tuning Magnetism and Photocurrent in Mn-Doped Organic-Inorganic Perovskites

Lixia Ren<sup>†</sup>, Yutao Wang<sup>‡</sup>, Min Wang<sup>†</sup>, Shuanhu Wang<sup>†</sup>, Yang Zhao<sup>†</sup>, Claudio Cazorla<sup>‡</sup>,  
Changle Chen<sup>†</sup>, Tom Wu<sup>\*,‡</sup> and Kexin Jin<sup>\*,†</sup>

<sup>†</sup> Shaanxi Key Laboratory of Condensed Matter Structures and Properties,  
School of Science, Northwestern Polytechnical University, Xi'an 710072, China

<sup>‡</sup> School of Materials Science and Engineering, University of New South Wales,  
Kensington, NSW, Australia

### ■ AUTHOR INFORMATION

#### Corresponding Author

\* E-mail: [jinkx@nwpu.edu.cn](mailto:jinkx@nwpu.edu.cn)

\* E-mail: [tom.wu@unsw.edu.au](mailto:tom.wu@unsw.edu.au)

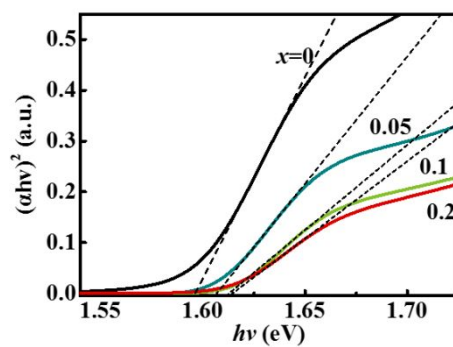

**Figure S1.** The Tauc plot method to deduce the optical bandgap of perovskite films.

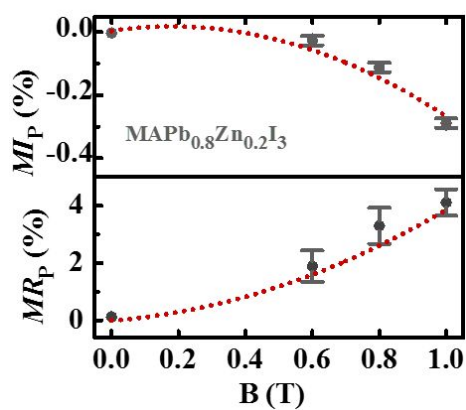

**Figure S2.**  $MI_P$  and  $MR_P$  for  $\text{MAPb}_{0.8}\text{Zn}_{0.2}\text{I}_3$  samples as a function of the magnetic field, respectively.

**Table S1.** The fitted positions and areas of Mn 2p XPS peaks.

| Peak                               | Position (eV) | Area    |
|------------------------------------|---------------|---------|
| Pb 4p <sub>3/2</sub>               | 642.6         | 19631.6 |
| Pb 4p <sub>1/2</sub>               | 650.4         | 16026.4 |
| Mn <sup>2+</sup> 2p <sub>3/2</sub> | 640.0         | 21286.1 |
| Mn <sup>2+</sup> 2p <sub>1/2</sub> | 645.3         | 5739.7  |
| Mn <sup>3+</sup> 2p <sub>3/2</sub> | 641           | 8439.0  |
